# Supplementary material for: A quasi-3D Sb2S3/reduced graphene oxide/MXene (Ti3C2Tx) hybrid for high-rate and durable sodium-ion batteries
Source: Royal Society of Chemistry journal article supplement (doi:10.1039/d2nr00655c), 2022-01-01
Supplement: d2nr00655c1.pdf [file d2nr00655c1.pdf]

## Supplementary Information

### **Quasi-3D Sb<sub>2</sub>S<sub>3</sub>/Reduced Graphene Oxide/MXene (Ti<sub>3</sub>C<sub>2</sub>T<sub>x</sub>) Hybrid for High-rate and Durable Sodium-Ion Batteries**

Pengxin Li, Rui Zang, Yuhan Wu, Shuaishuai Liu, Siyu Wang, Puyu Liu, Peng Li\*

College of Material Science and Engineering, Nanjing University of Aeronautics and  
Astronautics, Nanjing 211106, China.

\*Corresponding author. E-mail: LPeng@nuaa.edu.cn;

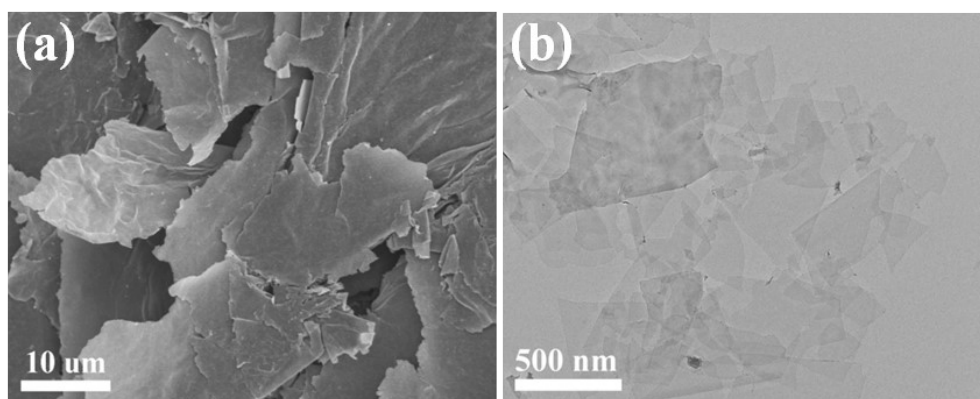

**Fig. S1** (a) SEM and (b) TEM images of the  $\text{Ti}_3\text{C}_2\text{T}_x$  MXene.

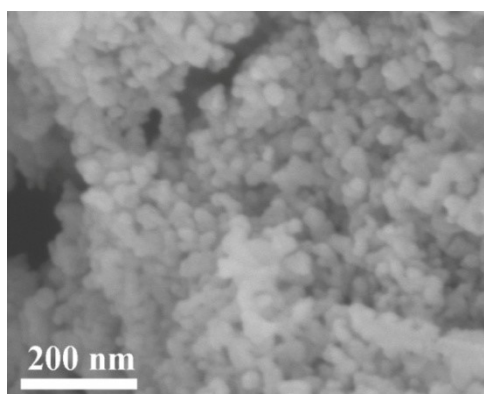

**Fig. S2** SEM image of the  $\text{Sb}_2\text{S}_3$  nanoparticles.

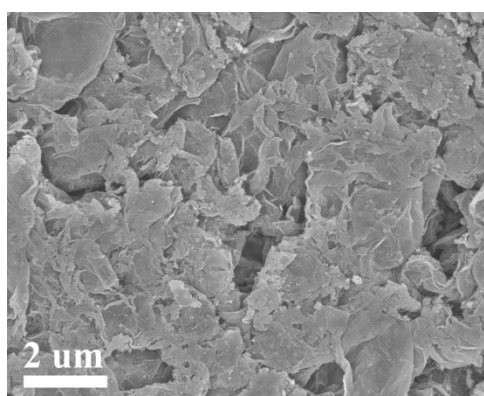

**Fig. S3** SEM image of the  $\text{Sb}_2\text{S}_3/\text{RGO}/\text{MXene}$  composite.

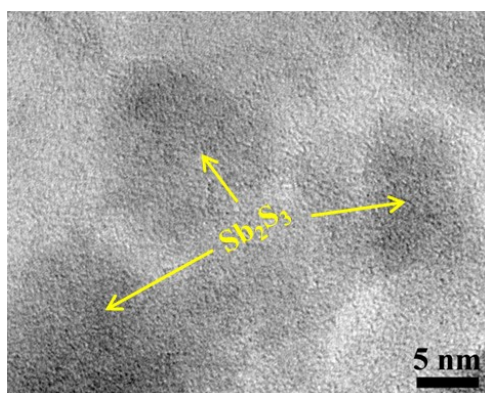

**Fig. S4** HRTEM image of the  $\text{Sb}_2\text{S}_3/\text{RGO}/\text{MXene}$  composite.

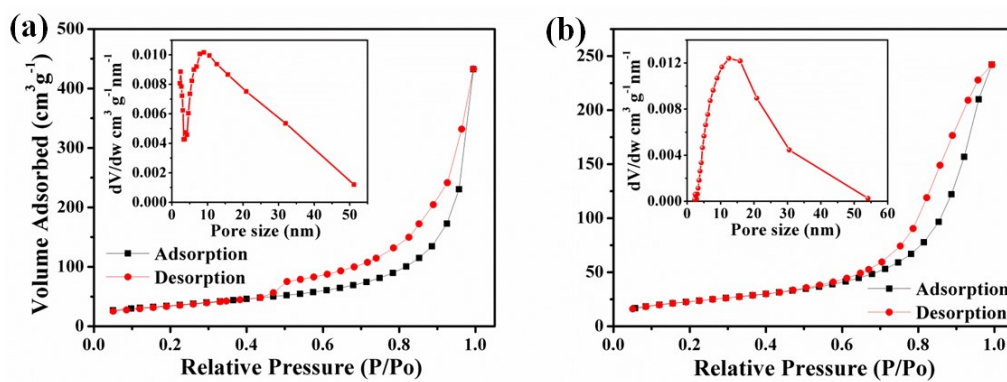

**Fig. S5**  $\text{N}_2$  adsorption/desorption isotherms and the corresponding pore size distribution curve (inset) of the (a)  $\text{Sb}_2\text{S}_3/\text{RGO}$  and (b)  $\text{Sb}_2\text{S}_3/\text{MXene}$  composite.

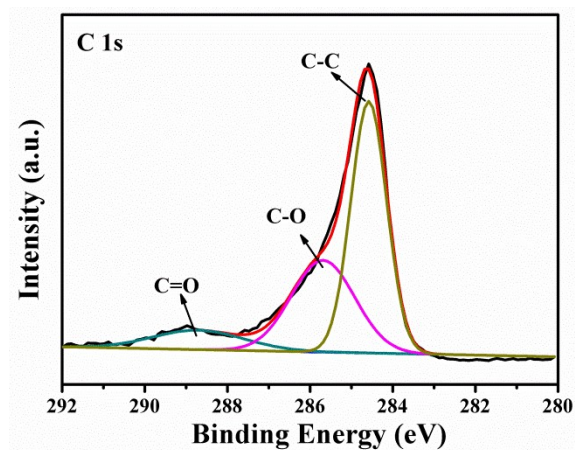

**Fig. S6** the high-resolution C 1s XPS spectra of Sb<sub>2</sub>S<sub>3</sub>/RGO composite

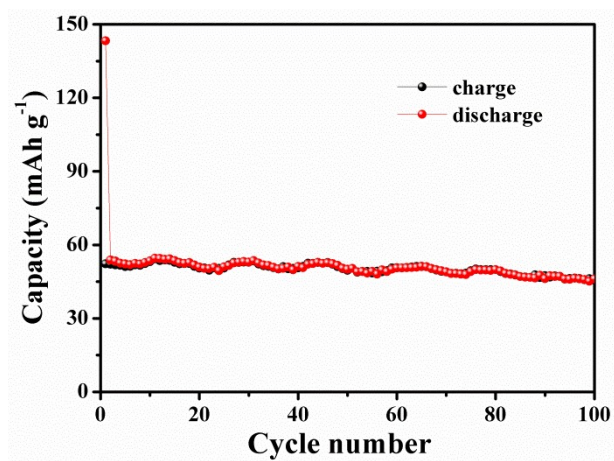

**Fig. S7** Cycling performances of the 3D RGO/MXene electrode

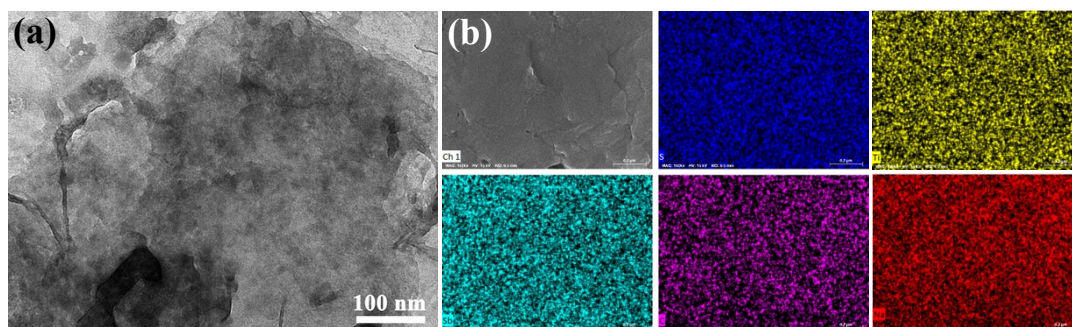

**Fig. S8** (a) TEM image of  $\text{Sb}_2\text{S}_3/\text{RGO}/\text{MXene}$  after 50 cycles at  $0.2 \text{ A} \cdot \text{g}^{-1}$ . (b) TEM elemental-mapping images for C, S, Sb, Ti and Na.

**Table S1** Electrochemical performance comparison between the  $\text{Sb}_2\text{S}_3/\text{RGO}/\text{MXene}$  composite and previously reported  $\text{Sb}_2\text{S}_3$ -based composites.

| Materials                                                     | Cycling stability ( $\text{mAh g}^{-1}$ )                                                                                    | Rate capability ( $\text{mAh g}^{-1}$ )    |
|---------------------------------------------------------------|------------------------------------------------------------------------------------------------------------------------------|--------------------------------------------|
| $\text{Sb}_2\text{S}_3/\text{CS}^1$                           | 321 after 200 cycles at $0.2 \text{ A} \cdot \text{g}^{-1}$                                                                  | 221 at $5 \text{ A} \cdot \text{g}^{-1}$   |
| $\text{Sb}_2\text{S}_3@\text{MWCNTs}^2$                       | 412.3 after 50 cycles at $0.05 \text{ A} \cdot \text{g}^{-1}$                                                                | 399.1 at $1 \text{ A} \cdot \text{g}^{-1}$ |
| $\text{Sb}_2\text{S}_3$ nanorods@ $\text{C}^3$                | 570 after 100 cycles at $0.1 \text{ A} \cdot \text{g}^{-1}$                                                                  | 337 at $2 \text{ A} \cdot \text{g}^{-1}$   |
| $\text{Sb}_2\text{S}_3$ hollow microspheres <sup>4</sup>      | 384 after 50 cycles at $0.2 \text{ A} \cdot \text{g}^{-1}$                                                                   | 275 at $4 \text{ A} \cdot \text{g}^{-1}$   |
| $\text{Sb}_2\text{S}_3/\text{PPy}$ Microspheres <sup>5</sup>  | 427 after 50 cycles at $0.1 \text{ A} \cdot \text{g}^{-1}$                                                                   | 513 at $1 \text{ A} \cdot \text{g}^{-1}$   |
| amorphous $\text{Sb}_2\text{S}_3$<br>anoparticle <sup>6</sup> | 586 after 100 cycles at $0.05 \text{ A} \cdot \text{g}^{-1}$                                                                 | 534 at $3 \text{ A} \cdot \text{g}^{-1}$   |
| $\text{Sn}@\text{Sb}_2\text{S}_3\text{-rGO}^7$                | 541 after 70 cycles at $0.5 \text{ A} \cdot \text{g}^{-1}$                                                                   | 360 at $5 \text{ A} \cdot \text{g}^{-1}$   |
| $\text{Sb}_2\text{S}_3/\text{C}^8$                            | 538 after 100 cycles at $0.2 \text{ A} \cdot \text{g}^{-1}$                                                                  | 520 at $2 \text{ A} \cdot \text{g}^{-1}$   |
| $\text{MWNTs}@\text{Sb}_2\text{S}_3@\text{PPy}^9$             | 500 after 85 cycles at $0.1 \text{ A} \cdot \text{g}^{-1}$                                                                   | 376 at $2 \text{ A} \cdot \text{g}^{-1}$   |
| <b>This work</b>                                              | 633.3 after 100 cycles at $0.2 \text{ A} \cdot \text{g}^{-1}$<br>442.6 after 500 cycles at $2 \text{ A} \cdot \text{g}^{-1}$ | 510.1 at $4 \text{ A} \cdot \text{g}^{-1}$ |

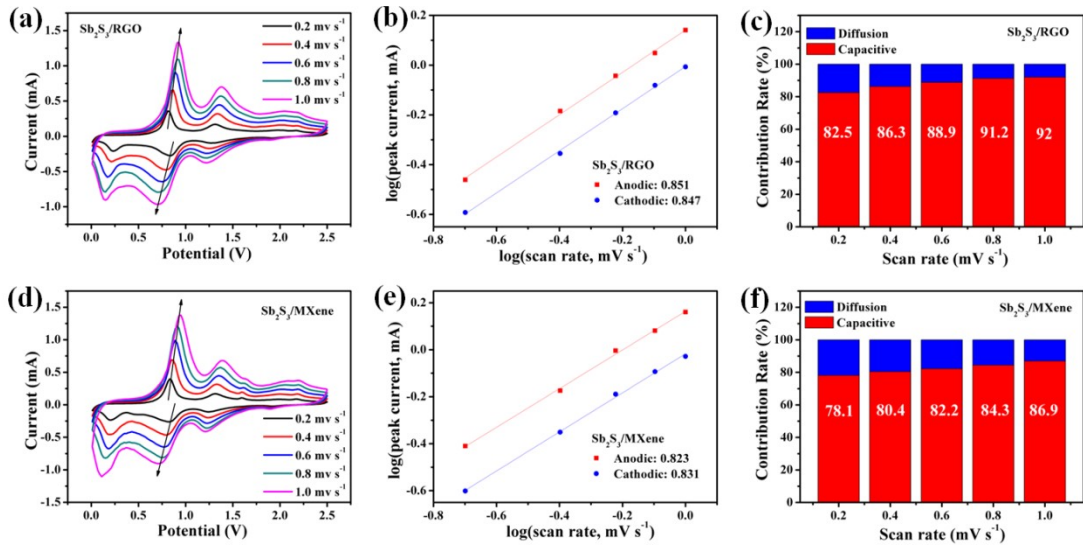

Fig. S9 (a, d) CV curves of the Sb<sub>2</sub>S<sub>3</sub>/RGO and Sb<sub>2</sub>S<sub>3</sub>/MXene electrode at different scan rates. (b, e) Corresponding log(i) versus log(v) plots for different redox peaks, respectively. (c, f) Capacitive contributions of the Sb<sub>2</sub>S<sub>3</sub>/RGO and Sb<sub>2</sub>S<sub>3</sub>/MXene electrode at various scan rates.

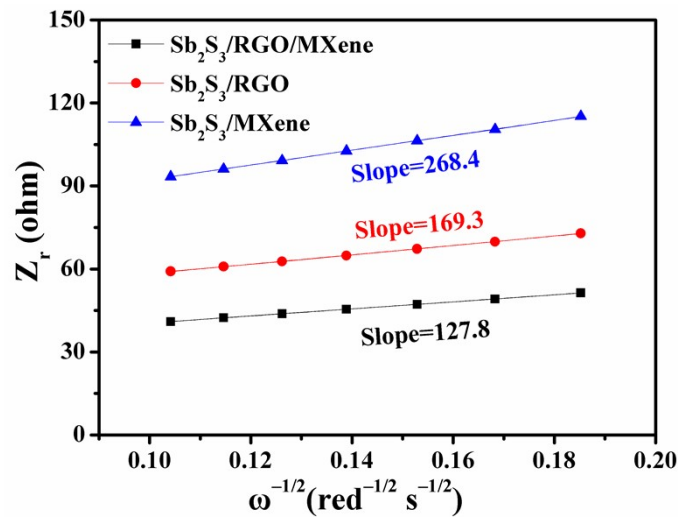

Fig. S10 Linear fits (relationship between  $Z'$  and  $\omega^{-1/2}$ ) in low-frequency region of the Sb<sub>2</sub>S<sub>3</sub>/RGO, Sb<sub>2</sub>S<sub>3</sub>/MXene and Sb<sub>2</sub>S<sub>3</sub>/RGO/MXene.

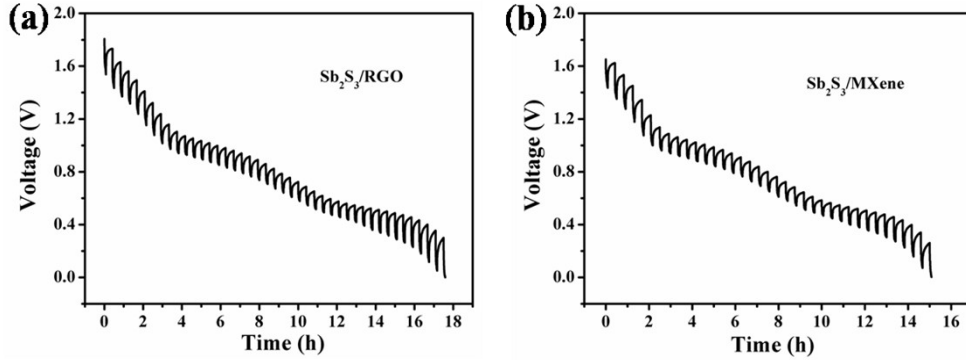

Fig. 11 The GITT curves of the  $\text{Sb}_2\text{S}_3/\text{RGO}$  and  $\text{Sb}_2\text{S}_3/\text{MXene}$  electrodes.

The value of  $D_{\text{GITT}}$  can be calculated by applying the following equation:

$$D_{\text{GITT}} = \frac{4}{\pi\tau} \left( \frac{nVm}{A} \right)^2 \left( \frac{\Delta E_s}{\Delta E_\tau} \right)^2 \left( \tau \ll \frac{L^2}{D} \right) \quad (\text{S1})$$

In equation S1,  $\tau$  represents the pulse time;  $n$  is the amount of substance of the material,  $Vm$  is the molar volume of the material;  $A$  is the area of the electrode;  $L$  is the thickness of the electrode;  $\Delta E_s$  is the voltage change caused by the pulse;  $\Delta E_\tau$  represents the voltage change during the pulse.

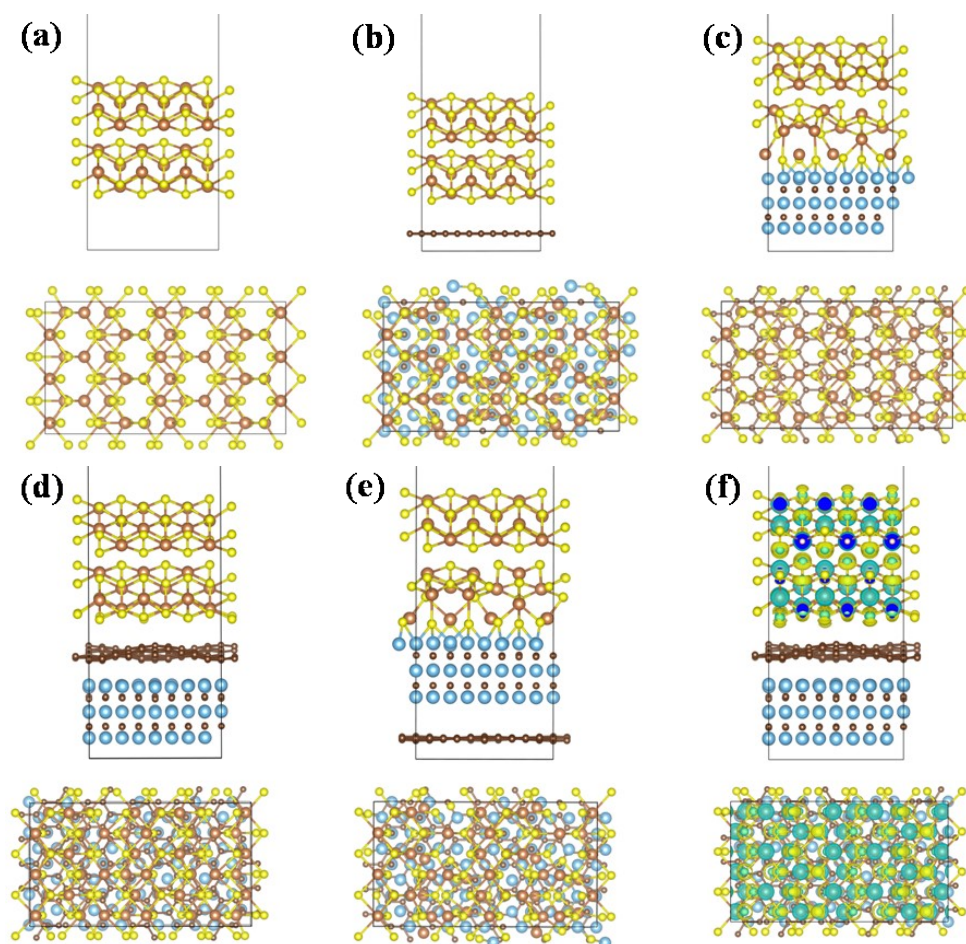

Fig. S12 Optimized structures for the adsorption of  $\text{Na}^+$  on (a)  $\text{Sb}_2\text{S}_3$ , (b)  $\text{Sb}_2\text{S}_3/\text{RGO}$ , (c)  $\text{Sb}_2\text{S}_3/\text{MXene}$ , (d)  $\text{Sb}_2\text{S}_3\text{-RGO-MXene}$  and (e)  $\text{Sb}_2\text{S}_3\text{-MXene-RGO}$  at side (top) and top (bottom) views. (f) Differential charge density of the  $\text{Sb}_2\text{S}_3\text{-RGO-MXene}$  at side (top) and top (bottom) views.

Table S2 The adsorption energy of  $\text{Na}^+$  on the  $\text{Sb}_2\text{S}_3$ ,  $\text{Sb}_2\text{S}_3/\text{RGO}$ ,  $\text{Sb}_2\text{S}_3/\text{MXene}$  and  $\text{Sb}_2\text{S}_3/\text{RGO}/\text{MXene}$ .

|                  | $\text{Sb}_2\text{S}_3$ | $\text{Sb}_2\text{S}_3/\text{RGO}$ | $\text{Sb}_2\text{S}_3/\text{MXene}$ | $\text{Sb}_2\text{S}_3/\text{RGO}/\text{MXene}$ |                                          |
|------------------|-------------------------|------------------------------------|--------------------------------------|-------------------------------------------------|------------------------------------------|
|                  |                         |                                    |                                      | $\text{Sb}_2\text{S}_3\text{-RGO-MXene}$        | $\text{Sb}_2\text{S}_3\text{-MXene-RGO}$ |
| $E_{\text{ads}}$ | 1.38 eV                 | 1.36 eV                            | 1.40 eV                              | 1.35 eV                                         | 1.49 eV                                  |



## References

1. J. Xie, J. Xia, Y. Yuan, L. Liu, Y. Zhang, S. Nie, H. Yan and X. Wang, *J. Power Sources*, 2019, 435, 226762.
2. J. Li, Y. Dong, X. Zhang, S. Hu, D. Li, P. Likun, *Electrochimica Acta*, 2017, 228, 436-446.
3. S. Yao, J. Cui, Z. Lu, Z. Xu, L. Qin, J. Huang, Z. Sadighi, F. Ciucci and J. K. Kim, *Adv. Energy Mater.*, 2017, 7, 1602149.
4. Y. Zhang, M. Li, Y. Ouyang, S. Nie and X. Wang, *Nano-Micro Letters*, 2018, 10, 12.
5. T. Zheng, G. Li, L. Zhao and Y. Shen, *Eur. J. Inorg. Chem.*, 2018, 10, 1224-1228.
6. S. Hwang, J. Kim and Y. Kim, *J. Mater. Chem. A*, 2016, 4, 17946-17951.
7. B. Qu, P. Deng, J. Yang, W. He and D. Tang, *ChemElectroChem*, 2018, 5, 1-7.
8. J. Choi, C. Ha, H. Choi, He. Shin and S. Lee, *Met. Mater. Int.*, 2017, 23, 1241-1249.
9. S. Wang, S. Yuan, Y. Yin, Y. Zhu, X. Zhang and J. Yan, *Part. Part. Syst. Char.*, 2016, 33, 493-499.
